# Supplementary material
Source: HighWire-hosted journal article supplement (https://www.cmaj.ca/highwire/filestream/69678/field_highwire_adjunct_files/3/170289-res-4-at.pdf)
Supplement: 170289-res-4-at.pdf [file 170289-res-4-at.pdf]

**Appendix 4 (as supplied by the authors):** Number of participants, mean scores, SD and 95% confidence intervals for CLEFT-Q scales by age group, sex and cleft type

|                    | Face      | Nose      | Nostrils  | Lips      | Cleft scar | Teeth     | Jaws      | Psych     | School    | Social    | Speech distress | Speech function |
|--------------------|-----------|-----------|-----------|-----------|------------|-----------|-----------|-----------|-----------|-----------|-----------------|-----------------|
| <i>Age (years)</i> |           |           |           |           |            |           |           |           |           |           |                 |                 |
| <b>8-9 (n)</b>     | 417       | 401       | 396       | 385       | 302        | 408       | n/a       | 396       | 379       | 398       | 328             | 327             |
| <b>Mean</b>        | 69.9      | 64.7      | 61.9      | 69.7      | 61.6       | 56.3      | n/a       | 78.3      | 75.2      | 73.0      | 65.0            | 63.9            |
| <b>SD</b>          | 19.6      | 22.2      | 29.8      | 24.4      | 27.5       | 23.2      | n/a       | 18.5      | 17.6      | 17.2      | 22.1            | 20.9            |
| <b>95% CI</b>      | 68.0-71.8 | 62.5-66.9 | 58.9-64.8 | 67.2-72.1 | 58.5-64.7  | 54.0-58.6 | n/a       | 76.5-80.2 | 73.5-77.0 | 71.3-74.7 | 62.6-67.4       | 61.7-66.2       |
| <b>10-11 (n)</b>   | 407       | 395       | 393       | 377       | 264        | 395       | n/a       | 380       | 363       | 379       | 312             | 310             |
| <b>Mean</b>        | 68.3      | 63.3      | 61.7      | 68.0      | 62.5       | 54.8      | n/a       | 76.5      | 75.4      | 74.1      | 69.8            | 67.5            |
| <b>SD</b>          | 19.1      | 21.7      | 27.9      | 23.9      | 26.1       | 22.4      | n/a       | 18.3      | 18.1      | 17.6      | 21.3            | 20.8            |
| <b>95% CI</b>      | 66.4-70.1 | 61.1-65.4 | 58.9-64.5 | 65.5-70.4 | 59.3-65.6  | 52.6-57.0 | n/a       | 74.7-78.3 | 73.5-77.3 | 72.3-75.9 | 67.5-72.2       | 65.1-69.8       |
| <b>12-13 (n)</b>   | 365       | 353       | 350       | 341       | 246        | 352       | 345       | 344       | 330       | 343       | 294             | 293             |
| <b>Mean</b>        | 65.4      | 61.9      | 60.1      | 66.3      | 60.7       | 52.6      | 72.7      | 75.9      | 77.0      | 75.3      | 70.9            | 70.9            |
| <b>SD</b>          | 18.9      | 24.1      | 29.6      | 24.1      | 26.7       | 22.7      | 25.7      | 17.7      | 17.5      | 17.2      | 21.1            | 21.6            |
| <b>95% CI</b>      | 63.4-67.3 | 59.4-64.5 | 57.0-63.2 | 63.7-68.8 | 57.4-64.1  | 50.2-55.0 | 70.0-75.5 | 74.0-77.7 | 75.1-78.9 | 73.4-77.1 | 68.5-73.3       | 68.5-73.4       |
| <b>14-15 (n)</b>   | 379       | 363       | 361       | 351       | 281        | 370       | 359       | 362       | 341       | 363       | 304             | 304             |
| <b>Mean</b>        | 61.1      | 56.9      | 54.2      | 60.3      | 58.3       | 53.7      | 67.8      | 72.3      | 75.9      | 72.8      | 70.7            | 72.3            |
| <b>SD</b>          | 20.2      | 23.1      | 28.2      | 24.5      | 28.5       | 23.7      | 26.6      | 19.2      | 17.6      | 17.1      | 21.5            | 21.9            |
| <b>95% CI</b>      | 59.1-63.2 | 54.5-59.3 | 51.3-57.1 | 57.8-62.9 | 54.9-61.6  | 51.3-56.1 | 65.0-70.5 | 70.3-74.3 | 74.0-77.8 | 71.1-74.6 | 68.2-73.1       | 69.8-74.8       |
| <b>16-17 (n)</b>   | 290       | 273       | 270       | 265       | 214        | 272       | 270       | 275       | 212       | 275       | 220             | 217             |
| <b>Mean</b>        | 59.5      | 55.0      | 54.0      | 58.5      | 54.8       | 57.5      | 67.0      | 71.8      | 76.4      | 73.9      | 72.1            | 72.1            |
| <b>SD</b>          | 18.8      | 22.5      | 28.1      | 24.5      | 27.6       | 24.9      | 27.2      | 19.4      | 18.0      | 17.7      | 20.5            | 21.2            |
| <b>95% CI</b>      | 57.4-61.7 | 52.3-57.7 | 50.7-57.4 | 55.5-61.4 | 51.0-58.5  | 54.5-60.5 | 63.7-70.3 | 69.5-74.1 | 74.0-78.9 | 71.8-76.0 | 69.4-74.9       | 69.3-75.0       |
| <b>18-20 (n)</b>   | 299       | 279       | 277       | 267       | 219        | 283       | 274       | 265       | 38        | 268       | 228             | 222             |
| <b>Mean</b>        | 56.6      | 51.1      | 49.0      | 54.9      | 53.4       | 57.2      | 64.0      | 68.3      | 75.2      | 70.4      | 68.2            | 70.1            |
| <b>SD</b>          | 17.3      | 22.2      | 28.6      | 22.7      | 30.0       | 23.6      | 25.9      | 18.9      | 17.4      | 17.0      | 20.0            | 20.9            |
| <b>95% CI</b>      | 54.7-58.6 | 48.5-53.7 | 45.6-52.4 | 52.2-57.6 | 49.4-57.4  | 54.4-60.0 | 60.9-67.1 | 66.0-70.5 | 69.5-80.9 | 68.4-72.5 | 65.6-70.9       | 67.4-72.9       |
| <b>≥21 (n)</b>     | 244       | 234       | 231       | 227       | 193        | 232       | 228       | 232       | n/a       | 236       | 204             | 196             |
| <b>Mean</b>        | 57.5      | 51.7      | 45.3      | 53.3      | 50.8       | 56.7      | 67.2      | 69.3      | n/a       | 71.0      | 67.5            | 70.4            |
| <b>SD</b>          | 18.3      | 22.2      | 28.2      | 25.6      | 30.5       | 25.9      | 28.1      | 18.7      | n/a       | 16.8      | 21.4            | 20.6            |
| <b>95% CI</b>      | 55.2-59.8 | 48.8-54.5 | 41.6-48.9 | 49.9-56.6 | 46.5-55.2  | 53.4-60.1 | 63.5-70.9 | 66.9-71.8 | n/a       | 68.9-73.2 | 64.5-70.4       | 67.4-73.3       |
| <b>p-value</b>     | <0.001    | <0.001    | <0.001    | <0.001    | <0.001     | 0.056     | 0.002     | <0.001    | 0.810     | 0.009     | 0.001           | <0.001          |
| <i>Sex</i>         |           |           |           |           |            |           |           |           |           |           |                 |                 |
| <b>Male (n)</b>    | 1332      | 1273      | 1261      | 1231      | 1044       | 1276      | 785       | 1251      | 938       | 1257      | 1051            | 1042            |
| <b>Mean</b>        | 63.9      | 59.3      | 56.7      | 63.5      | 59.9       | 55.3      | 70.0      | 74.7      | 76.1      | 73.8      | 69.0            | 68.3            |
| <b>SD</b>          | 19.3      | 22.8      | 28.5      | 24.1      | 27.6       | 23.0      | 25.7      | 18.7      | 18.0      | 17.3      | 21.8            | 21.7            |
| <b>95% CI</b>      | 62.9-65.0 | 58.1-60.6 | 55.1-58.3 | 62.2-64.8 | 58.2-61.6  | 54.1-56.6 | 68.2-71.8 | 73.6-75.7 | 75.0-77.3 | 72.8-74.7 | 67.7-70.4       | 67.0-69.7       |
| <b>Female (n)</b>  | 1068      | 1024      | 1016      | 981       | 674        | 1035      | 690       | 1002      | 725       | 1004      | 839             | 827             |
| <b>Mean</b>        | 62.7      | 57.8      | 55.5      | 61.4      | 55.0       | 55.4      | 65.8      | 72.6      | 75.6      | 72.3      | 69.2            | 70.6            |
| <b>SD</b>          | 19.9      | 23.5      | 30.1      | 25.8      | 29.0       | 24.5      | 27.8      | 19.1      | 17.3      | 17.3      | 20.7            | 20.8            |
| <b>95% CI</b>      | 61.5-63.9 | 56.4-59.3 | 53.7-57.4 | 59.8-63.0 | 52.8-57.2  | 53.9-56.9 | 63.7-67.9 | 71.5-73.8 | 74.3-76.9 | 71.2-73.4 | 67.8-70.6       | 69.2-72.0       |
| <b>p-value</b>     | 0.140     | 0.120     | 0.335     | 0.049     | <0.001     | 0.974     | 0.003     | 0.011     | 0.552     | 0.042     | 0.872           | 0.024           |
| <i>Cleft type</i>  |           |           |           |           |            |           |           |           |           |           |                 |                 |
| <b>CL (n)</b>      | 261       | 254       | 250       | 253       | 244        | 254       | 150       | 248       | 186       | 248       | n/a             | n/a             |
| <b>Mean</b>        | 66.1      | 62.4      | 57.9      | 64.8      | 61.8       | 60.4      | 77.6      | 76.2      | 79.7      | 75.9      | n/a             | n/a             |
| <b>SD</b>          | 18.4      | 22.2      | 28.3      | 21.9      | 26.8       | 22.1      | 21.8      | 17.2      | 16.3      | 15.8      | n/a             | n/a             |
| <b>95% CI</b>      | 63.8-68.3 | 59.7-65.2 | 54.4-61.4 | 62.1-67.5 | 58.5-65.2  | 57.6-63.1 | 74.0-81.1 | 74.0-78.3 | 77.3-82.0 | 73.9-77.8 | n/a             | n/a             |
| <b>CP (n)</b>      | 549       | 499       | 493       | 439       | n/a        | 535       | 308       | 515       | 410       | 515       | 498             | 492             |

Appendix to: Klassen AF, Wong Riff KKY, Longmire NM et al. Psychometric findings and normative values for the CLEFT-Q based on 2434 children and young adult patients with cleft lip and/or palate from 12 countries. *CMAJ* 2018. doi: 10.1503/cmaj.170289.

|                  |               |               |               |               |               |               |               |               |               |               |               |               |
|------------------|---------------|---------------|---------------|---------------|---------------|---------------|---------------|---------------|---------------|---------------|---------------|---------------|
| <b>Mean</b>      | 70.8          | 71.7          | 74.7          | 74.4          | n/a           | 60.1          | 71.3          | 76.7          | 76.4          | 74.6          | 70.9          | 70.3          |
| <b>SD</b>        | 19.0          | 21.4          | 24.7          | 23.1          | n/a           | 23.6          | 26.4          | 18.1          | 17.6          | 17.1          | 20.6          | 22.0          |
| <b>95% CI</b>    | 69.2-<br>72.4 | 69.8-<br>73.6 | 72.5-<br>76.9 | 72.2-<br>76.6 | n/a           | 58.1-<br>62.1 | 68.4-<br>74.3 | 75.1-<br>78.3 | 74.7-<br>78.1 | 73.1-<br>76.1 | 69.1-<br>72.7 | 68.3-<br>72.2 |
| <b>CL/P (n)</b>  | 1393          | 1348          | 1339          | 1328          | 1288          | 1328          | 895           | 1306          | 919           | 1315          | 1260          | 1246          |
| <b>Mean</b>      | 60.0          | 53.5          | 49.7          | 58.2          | 57.2          | 51.8          | 64.7          | 72.1          | 74.5          | 71.6          | 67.3          | 67.6          |
| <b>SD</b>        | 19.2          | 21.9          | 28.3          | 24.8          | 28.6          | 23.2          | 26.9          | 19.5          | 18.3          | 17.7          | 21.3          | 20.8          |
| <b>95% CI</b>    | 59.0-<br>61.0 | 52.3-<br>54.7 | 48.2-<br>51.2 | 56.8-<br>59.5 | 55.6-<br>58.8 | 50.5-<br>53.0 | 63.0-<br>66.5 | 71.1-<br>73.2 | 73.4-<br>75.7 | 70.7-<br>72.6 | 66.1-<br>68.5 | 66.5-<br>68.8 |
| <b>CLA (n)</b>   | 199           | 197           | 196           | 193           | 187           | 195           | 123           | 186           | 148           | 185           | 132           | 131           |
| <b>Mean</b>      | 62.8          | 55.9          | 51.5          | 63.1          | 58.1          | 60.3          | 71.9          | 73.9          | 78.1          | 75.9          | 79.7          | 82.1          |
| <b>SD</b>        | 19.8          | 22.9          | 27.3          | 24.3          | 27.7          | 24.7          | 27.7          | 17.9          | 15.6          | 16.0          | 20.0          | 19.4          |
| <b>95% CI</b>    | 60.0-<br>65.5 | 52.7-<br>59.2 | 47.6-<br>55.3 | 59.6-<br>66.5 | 54.1-<br>62.1 | 56.8-<br>63.8 | 67.0-<br>76.8 | 71.3-<br>76.5 | 75.5-<br>80.6 | 73.6-<br>78.2 | 76.3-<br>83.1 | 78.8-<br>85.5 |
| <b>p-value</b>   | <0.001        | <0.001        | <0.001        | <0.001        | 0.062         | <0.001        | <0.001        | <0.001        | 0.001         | <0.001        | <0.001        | <0.001        |
| <b>Overall</b>   |               |               |               |               |               |               |               |               |               |               |               |               |
| <b>Total (n)</b> | 2402          | 2298          | 2278          | 2213          | 1719          | 2312          | 1476          | 2255          | 1663          | 2263          | 1890          | 1869          |
| <b>Mean</b>      | 63.4          | 58.7          | 56.2          | 62.6          | 58.0          | 55.4          | 68.0          | 73.8          | 75.9          | 73.1          | 69.1          | 69.3          |
| <b>SD</b>        | 19.6          | 23.1          | 29.2          | 24.9          | 28.3          | 23.7          | 26.8          | 18.9          | 17.7          | 17.3          | 21.3          | 21.3          |
| <b>95% CI</b>    | 62.6-<br>64.2 | 57.7-<br>59.6 | 55.0-<br>57.4 | 61.5-<br>63.6 | 56.6-<br>59.3 | 54.4-<br>56.3 | 66.6-<br>69.4 | 73.0-<br>74.5 | 75.0-<br>76.7 | 72.4-<br>73.8 | 68.2-<br>70.1 | 68.4-<br>70.3 |

Note: CL/P = cleft lip and palate; CP = cleft palate; CL = cleft lip; CLA = cleft lip and alveolus
